# Supplementary material for: Concurrent thiol–ene competitive reactions provide reprocessable, degradable and creep-resistant dynamic–permanent hybrid covalent networks
Source: Royal Society of Chemistry journal article supplement (doi:10.1039/d0gc02823a), 2020-01-01
Supplement: d0gc02823a1.pdf [file d0gc02823a1.pdf]

**Concurrent Thiol-ene Competitive Reactions Enable Reprocessable, Degradable  
and Creep-resistant Dynamic-permanent Hybrid Covalent Networks**

Qiong Li<sup>1, 2</sup>, Songqi Ma<sup>1\*</sup>, Na Lu<sup>1, 2</sup>, Jianfan Qiu<sup>1, 2</sup>, Jiale Ye<sup>1</sup>, Yanlin Liu<sup>1</sup>, Sheng Wang<sup>1, 2</sup>,  
Yingying Han<sup>3</sup>, Binbo Wang<sup>1</sup>, Xiwei Xu<sup>1</sup>, Hongzhi Feng<sup>1, 2</sup>, Jin Zhu<sup>1\*</sup>

<sup>1</sup>Key Laboratory of Bio-based Polymeric Materials Technology and Application of Zhejiang  
Province, Laboratory of Polymers and Composites, Ningbo Institute of Materials Technology  
and Engineering, Chinese Academy of Sciences, Ningbo 315201, P. R. China;

<sup>2</sup>University of Chinese Academy of Sciences, Beijing 100049, P. R. China;

<sup>3</sup>Public Technology Service Center, Ningbo Institute of Materials Technology and Engineering,  
Chinese Academy of Sciences, Ningbo 315201, P. R. China.

\*Corresponding authors: (Songqi Ma) E-mail [masongqi@nimte.ac.cn](mailto:masongqi@nimte.ac.cn), Tel 86-574-87619806;

(Jin Zhu) E-mail [jzhu@nimte.ac.cn](mailto:jzhu@nimte.ac.cn).

## Contents

|                                                                                                                                                |    |
|------------------------------------------------------------------------------------------------------------------------------------------------|----|
| Experimental .....                                                                                                                             | 4  |
| <b>Materials</b> .....                                                                                                                         | 4  |
| <b>Methods</b> .....                                                                                                                           | 4  |
| Synthesis of S,O-acetal AB .....                                                                                                               | 4  |
| Synthesis of S,O-acetal CD .....                                                                                                               | 5  |
| Mechanism of S,O-acetal exchange reactions via model compounds .....                                                                           | 5  |
| Synthesis of S,O-covalent adaptable networks (PTCD) .....                                                                                      | 5  |
| Synthesis of the control AIBN-PTCD network .....                                                                                               | 5  |
| Gel Content Test .....                                                                                                                         | 6  |
| Reprocess Recycling .....                                                                                                                      | 6  |
| Chemical degradation .....                                                                                                                     | 6  |
| Instrumentation .....                                                                                                                          | 7  |
| Calculation of Activation energies ( $E_a$ ) and Topology-freezing temperatures ( $T_v$ ) .....                                                | 8  |
| Supporting Figures and Tables .....                                                                                                            | 9  |
| <b>Fig. S1</b> $^1\text{H}$ NMR spectrum of the 0.1 M HCl acetone- $\text{d}_6/\text{H}_2\text{O}$ (9/1, v/v) solution after adding PTCD. .... | 9  |
| <b>Fig. S2</b> Hot-pressing of the precured PTMP and CDVE with AIBN at 160 °C for 1 h under a pressure of 10 MPa. ....                         | 9  |
| <b>Fig. S3</b> Non-isothermal DSC curve of PTCD. ....                                                                                          | 10 |
| <b>Fig. S4</b> TGA curve of PTCD. ....                                                                                                         | 10 |
| <b>Fig. S5</b> DMA curves of PTCD. ....                                                                                                        | 10 |
| <b>Fig. S6</b> Representative tensile stress-strain curve of PTCD and the controlled AIBN-PTCD. ....                                           | 11 |
| <b>Fig. S7</b> Creep recovery curves of PTCD at different temperatures. ....                                                                   | 11 |
| <b>Scheme S1</b> Synthesis of model S,O-acetal <b>AB</b> . ....                                                                                | 11 |
| <b>Scheme S2</b> Synthesis of model S,O-acetal <b>CD</b> . ....                                                                                | 11 |
| <b>Fig. S8</b> $^1\text{H}$ NMR spectrum of model S,O-acetal <b>AB</b> . ....                                                                  | 12 |
| <b>Fig. S9</b> $^{13}\text{C}$ NMR spectrum of model S,O-acetal <b>AB</b> . ....                                                               | 12 |

|                                                                                                                                                                                                               |    |
|---------------------------------------------------------------------------------------------------------------------------------------------------------------------------------------------------------------|----|
| <b>Fig. S10</b> $^1\text{H}$ NMR spectrum of model S,O-acetal <b>CD</b> .....                                                                                                                                 | 12 |
| <b>Fig. S11</b> $^{13}\text{C}$ NMR spectrum of model S,O-acetal <b>CD</b> .....                                                                                                                              | 12 |
| <b>Fig. S12</b> MS spectrum of <b>AB</b> . ....                                                                                                                                                               | 13 |
| <b>Fig. S13</b> MS spectrum of <b>CD</b> . ....                                                                                                                                                               | 13 |
| <b>Fig. S14</b> MS spectrum of <b>A</b> . ....                                                                                                                                                                | 14 |
| <b>Fig. S15</b> MS spectrum of <b>B</b> . ....                                                                                                                                                                | 14 |
| <b>Fig. S16</b> MS spectrum of <b>C</b> . ....                                                                                                                                                                | 15 |
| <b>Fig. S17</b> MS spectrum of <b>D</b> . ....                                                                                                                                                                | 15 |
| <b>Fig.S18</b> Normalized GC spectra of S,O-thioacetal <b>AB</b> and S,O-thioacetal <b>CD</b> mixture at 160 °C for 3 h. ....                                                                                 | 16 |
| <b>Fig. S19</b> MS spectrum of CD's radical products. ....                                                                                                                                                    | 16 |
| <b>Fig. S20</b> Representative tensile stress-strain curves of the original and reprocessed PTCD....                                                                                                          | 17 |
| <b>Fig. S21</b> Image of PTCD immersed in MEK at 50 °C for 48 h. ....                                                                                                                                         | 17 |
| <b>Fig. S22</b> Degradation images of PTCD in 1 M HCl MEK solution at 50 °C.....                                                                                                                              | 18 |
| <b>Fig. S23</b> Real-time $^1\text{H}$ NMR spectra of the 1 M HCl acetone- $\text{d}_6/\text{H}_2\text{O}$ (9/1, v/v) solution after adding S,O-acetal <b>CD</b> for different times at room temperature..... | 19 |
| <b>Table S1</b> Degradation rate of PTCD at different conditions. ....                                                                                                                                        | 20 |
| <b>References</b> .....                                                                                                                                                                                       | 20 |

## Experimental

### Materials

N-butyl mercaptan (N-btSH) (99%), methyl 3-mercaptopropionate (98%), pentaerythritol tetra(3-mercaptopropionate) (PTMP) (95%), 1,4-cyclohexanedimethanol divinyl ether (CDVE, mixture of isomers) were obtained from Sigma-Aldrich Co., China. n-Butyl vinyl ether (IBVE), cyclohexyl vinyl ether (CHVE), 2,2'-azobis(2-methylpropionitrile) (AIBN) were supplied by Aladdin Reagent Co., China. Methyl ethyl ketone (MEK), acetone, tetrahydrofuran (THF), N, N-dimethylformamide (DMF), toluene, ethanol and methanol were from Sinopharm Chemical Reagent Co., Ltd., China. Isobutyl vinyl ether are distilled under reduced pressure before use. All other chemicals were used as received.

### Methods

#### Synthesis of S,O-acetal AB

The reaction was initiated by the addition of IBVE (2.5, 25 mmol) via a dry syringe into a solution containing N-btSH (2.25 mL, 25 mmol), PTSA (9.51 mg, 0.05 mmol) in  $\text{CH}_2\text{Cl}_2$  (6 mL) and THF (0.5 mL) in a 20 mL small bottle at  $-78\text{ }^\circ\text{C}$  for 20 min, and then the reaction was terminated with methanol containing a small amount of triethylamine. The quenched reaction mixture was washed with sodium hydroxide aqueous solution and distilled water. The organic layer was concentrated to dryness under reduced pressure and vacuum-dried to give the product<sup>1</sup>. The synthetic route is illustrated in Scheme S1.

$^1\text{H}$  NMR (400 MHz,  $\text{DMSO-d}_6$ )  $\delta$  4.73 – 4.63 (m, 1H), 3.35 (dd,  $J = 15.8, 1.1$  Hz, 1H), 3.19 – 3.09 (m, 1H), 2.65 – 2.49 (m, 2H), 1.76 (dt,  $J = 13.3, 6.6$  Hz, 1H), 1.59 – 1.38 (m, 6H), 1.38 – 1.28 (m, 2H), 0.86 (dt,  $J = 6.9, 1.5$  Hz, 9H).

$^{13}\text{C}$  NMR (100 MHz,  $\text{DMSO-d}_6$ )  $\delta$  81.08 , 73.40 , 32.31 , 28.32 , 27.47 , 22.81 , 22.00 , 19.78 , 13.93 .

### Synthesis of S,O-acetal **CD**

Synthetic steps are the same as above, as shown in Scheme S2.

$^1\text{H}$  NMR (400 MHz, DMSO- $d_6$ )  $\delta$  4.87 – 4.76 (m, 1H), 3.60 (d,  $J$  = 1.1 Hz, 4H), 2.83 – 2.65 (m, 2H), 2.61– 2.54 (m, 2H), 1.86 – 1.78 (m, 1H), 1.74 (q,  $J$  = 9.6, 7.7 Hz, 1H), 1.65 (q,  $J$  = 5.7, 4.7 Hz, 2H), 1.52 – 1.39 (m, 3H), 1.32 – 1.11 (m, 6H).

$^{13}\text{C}$  NMR (101 MHz, DMSO- $d_6$ )  $\delta$  172.34 , 78.21 , 73.99 , 51.82 , 35.30 , 33.10 , 31.51 , 25.73 , 24.13 , 23.89 , 23.66 , 22.73 .

### Mechanism of S,O-acetal exchange reactions via model compounds

A 5-mL vial containing model S,O-acetal **AB** (1 mmol) and S,O-acetal **CD** (1 mmol) was placed in a preheated oil bath at 100, 120, 140, 160 °C, and aliquot 2  $\mu\text{L}$  was taken every 30 min and diluted in 1000  $\mu\text{L}$   $\text{CHCl}_3$  for GC-MS spectroscopy. Rates of exchange were calculated by monitoring the change in concentration of acetal **AB** ([**1**]).

### Synthesis of S,O-covalent adaptable networks (PTCD)

Covalent adaptable networks (PTCD) were prepared by mixing 1 equivalent Pentaerythritol Tetra(3-mercaptopropionate) (PTMP) with 2 equivalent 1,4-cyclohexanedioethylene ether (CDVE) at 80 °C for 4h to form a gel. The gelled PTCD was pressed at 160 °C for 30 min and then postcured at 160 °C for 2 h to obtain PTCD films with a thickness of  $\sim 300\ \mu\text{m}$  for examination of thermal, mechanical, and recycling property.

### Synthesis of the control AIBN-PTCD network

The control AIBN-PTCD were prepared by mixing 1 equivalent PTMP, 2 equivalent CDVE with 0.01 equivalent AIBN and poured into the PTFE mold. The mixture was heated 80 °C for 4 h, a 120 °C for 2 h and followed postcured at 160 °C for 2 h at oven.

### **Gel Content Test**

PTCD (around 200 mg) was separately put into a Soxhlet extractor for extraction with tetrahydrofuran for 48 h and then dried in a vacuum oven at 70 °C for 12 h.  $m_0$  is the initial mass, and  $m_1$  is the final mass after drying; the gel content is calculated by  $100\% \times m_1/m_0$ .

Swelling Ratio Measurements.

PTCD (around 200 mg) were separately immersed in, THF, DMF, acetone, MEK, ethanol, methanol, and deionized water at 50 °C for 48 h.  $m_0$  is the initial mass, and  $m_1$  is the mass after swelling; the swelling ratio was calculated by  $100\% \times (m_1 - m_0)/m_0$

### **Reprocess Recycling**

The reprocess recycling tests were implemented with a plate vulcanizer at elevated temperature and pressure. The original films were cut into small pieces; placed between two steel sheets covered with two polyimide films to avoid adherence of PTCD on the steel sheets; and hot-pressed under a pressure of 10 MPa at 180 °C for 1 h. After cooling the films to room temperature, reprocessed films were obtained. The remodeling experiment was repeated twice by the same procedure.

### **Chemical degradation**

Chemical degradation was examined by immersing around 300 mg of PTCD in 10 mL vial containing corresponding solutions at 50 or 25 °C. Degradation times refer to the times when the samples were completely dissolved in the solution. The degradation rate was calculated based on the starting weight, the final weight, the degradation time and the volume of the acidic solutions used for the degradation. 1 M HCl solutions with different volume ratio of water to MEK or THF was added into vials at 50 °C. 0.01 M, 0.1 M, 0.5 M, 1.0 M HCl solutions with water and different type of main solvents in different proportions at 50 °C, and 1 M acetic acid solution, sulfuric acid solution, and phosphoric acid solution were also used to measure the

degradation of PTCD in different acid. Different ratio of main solvent to water at 1M HCl was also used to measure.

## **Instrumentation**

Nuclear magnetic resonance (NMR) spectra were recorded on a Bruker Avance II spectrometer at 400 MHz ( $^1\text{H}$  NMR) and 100 MHz ( $^{13}\text{C}$  NMR), respectively, using DMSO- $d_6$  as the solvent. Fourier-transform infrared (FTIR) spectra were recorded with a Nicolet 6700 FTIR spectrometer (Nicolet) using the KBr pellet method. FTIR spectra of PTCD were recorded on a Micro-FTIR Cary 660 spectrometer (Agilent), and the absorbance mode was used.

Differential scanning calorimetry (DSC) was implemented using a Mettler-Toledo Star 1 under a nitrogen atmosphere. The cured samples (around 6–8 mg) were heated from  $-100$  to  $150$   $^{\circ}\text{C}$  at a heating rate of  $20$   $^{\circ}\text{C min}^{-1}$ , kept at  $100$   $^{\circ}\text{C}$  for 3 min, cooled to  $20$   $^{\circ}\text{C}$  at a cooling rate of  $50$   $^{\circ}\text{C min}^{-1}$ , and then heated to  $100$   $^{\circ}\text{C}$  at a heating rate of  $20$   $^{\circ}\text{C min}^{-1}$ . Glass transition temperatures were found by taking the midpoint of the reversible endotherm of the second heating curve for each sample.

Thermogravimetric analyses (TGA) were performed on a Mettler Toledo TGA/SDTA 851e in a temperature window of  $50$ – $700$   $^{\circ}\text{C}$  at a heating rate of  $10$   $^{\circ}\text{C/min}$  under a nitrogen atmosphere. Dynamic mechanical analysis (DMA) was performed on a Q800 DMA (TA Instruments) in a tension mode with dimensions of around  $20$  mm (length)  $\times$   $5$  mm (width)  $\times$   $0.3$  mm (thickness) to measure the dynamic mechanical properties of PRCs from  $-100$  to  $100$   $^{\circ}\text{C}$  at a heating rate of  $3$   $^{\circ}\text{C min}^{-1}$  at a frequency of  $1$  Hz.

Rheology experiments were performed on an Anton Paar MCR 302. The experiments were performed in parallel plate geometry using  $0.5$  mm sample disks. Unless specified, the experiments were performed using a normal force of  $5$  N, a frequency of  $1$  Hz. For stress relaxation experiments, a strain of  $5\%$  was applied to the material, and the relaxation modulus was followed over time at a constant temperature. For frequency sweep experiments, the frequency was varied from  $100$  to  $0.1$  Hz.

Creep experiments were performed on the Q800 DMA. The samples were stretched by a constant force of  $1$  MPa at a preset temperature for  $10$  min, followed by a  $90$  min recovery

period.

Tensile testing was done by a universal mechanical testing machine (Instron 5569A). The samples with dimensions of 30 mm (length)  $\times$  0.5 mm (width)  $\times$  0.3 mm (thickness) were measured at a cross-head speed of 1 mm min<sup>-1</sup>. The tensile properties of each sample were reported as the average of five repeated measurements.

### **Calculation of Activation energies ( $E_a$ ) and Topology-freezing temperatures ( $T_v$ )**

$E_a$  of exchange reaction and  $T_v$  of PTCD were determined using the methodology reported in literature<sup>2</sup>. The characteristic relaxation times ( $\tau^*$ s) were fit to the Arrhenius law in supplementary equation 1<sup>1</sup>.

**Supplementary equation 1:** 
$$\tau^*(T) = \tau_0^* e^{\frac{E_a}{RT}}$$

(R: universal gas constant; 8.314 J K<sup>-1</sup> mol<sup>-1</sup>)

**Supplementary equation 2:** 
$$\ln \tau^*(T) = \ln \tau_0^* + \frac{E_a}{RT}$$

$T_v$  is the temperature at which the relaxation time  $\tau^*$  is 10<sup>6</sup> s according to the same method from Capelot et al<sup>2</sup>. The measured values of characteristic relaxation times ( $\tau^*$ s) were plotted versus 1000/T.

$$\text{PTCD: } y=16.8x-29.8 \quad E_a = 140 \text{ kJ mol}^{-1} \quad T_v = 113 \text{ }^\circ\text{C}$$



Chemical reaction scheme showing the deprotection of a bis-THP-protected diol (left) to yield a bis-thiol diol (middle) and two equivalents of 4-hydroxybenzoic acid (right). The 1H NMR spectrum (bottom) shows the chemical shifts of the products. The spectrum includes peaks for the bis-thiol diol (labeled 'b' at ~3.6 ppm, ~2.6 ppm, ~1.8 ppm, ~1.2 ppm, ~0.9 ppm) and 4-hydroxybenzoic acid (labeled 'a' at ~1.2 ppm, ~0.9 ppm). The acetone solvent peak is at ~2.1 ppm. Integration values are provided for the peaks: 1.00 for the bis-thiol diol, 0.55 for the 4-hydroxybenzoic acid, 0.53 for the 4-hydroxybenzoic acid, 0.28 for the 4-hydroxybenzoic acid, and 0.31 for the 4-hydroxybenzoic acid.

Assuming that the proportion of Markovnikov products is  $n$ , the proportion of anti-Markovnikov products is  $1-n$ .

$$\frac{4n + 6 \times (1 - n)}{3n + 5} = \frac{1}{0.55 + 0.53 + 0.28 + 0.31} \quad n = 0.79$$

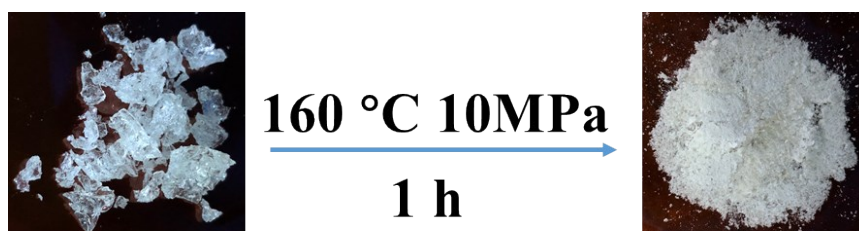

**Fig. S2** Hot-pressing of the precured PTMP and CDVE with AIBN at 160 °C for 1 h under a pressure of 10 MPa.

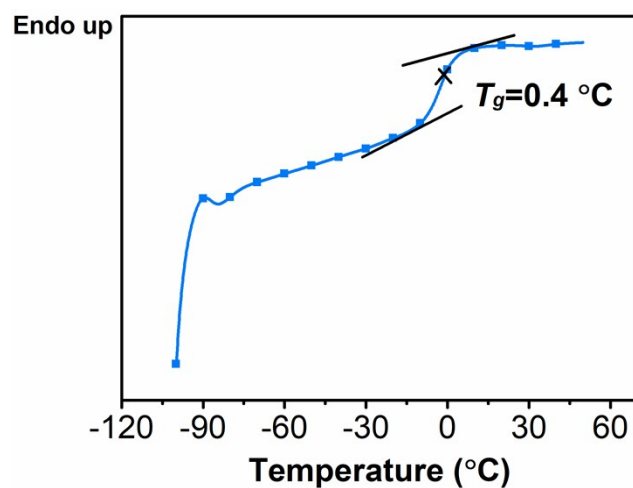

**Fig. S3** Non-isothermal DSC curve of PTCD.

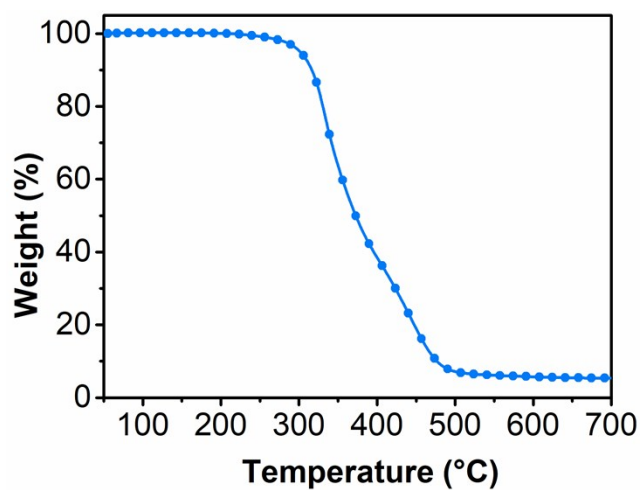

**Fig. S4** TGA curve of PTCD.

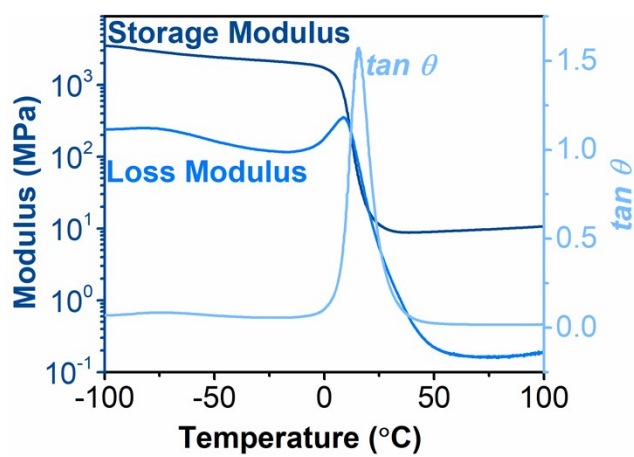

**Fig. S5** DMA curves of PTCD.

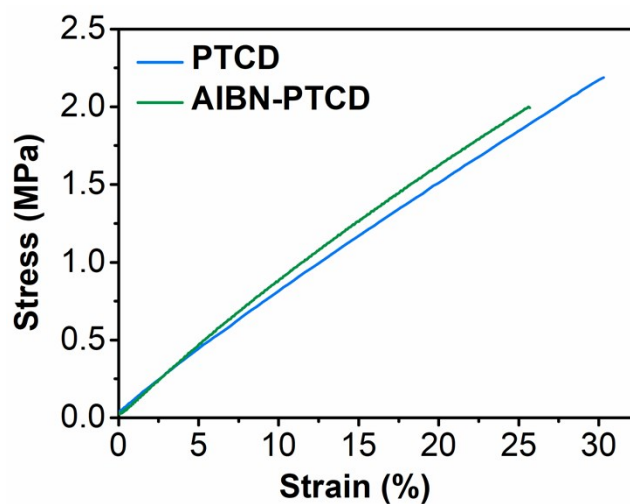

**Fig. S6** Representative tensile stress-strain curve of PTCd and the controlled AIBN-PTCD.

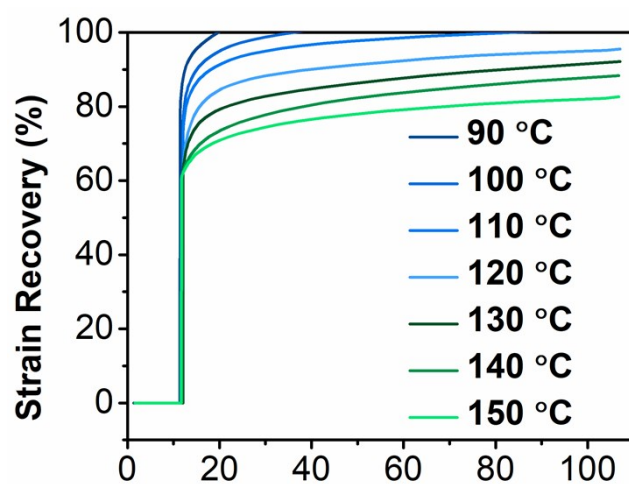

**Fig. S7** Creep recovery curves of PTCd at different temperatures.

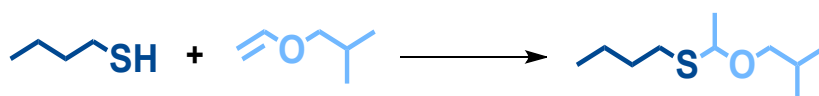

**Scheme S1** Synthesis of model S,O-acetal **AB**.

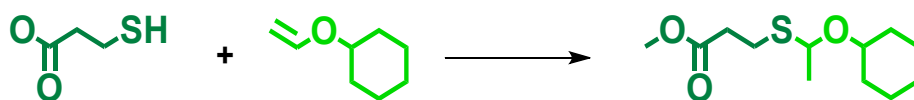

**Scheme S2** Synthesis of model S,O-acetal **CD**.

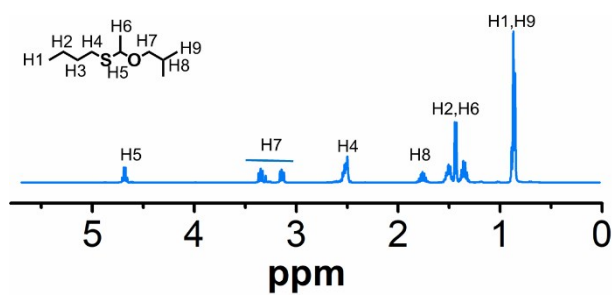

**Fig. S8**  $^1\text{H}$  NMR spectrum of model S,O-acetal **AB**.

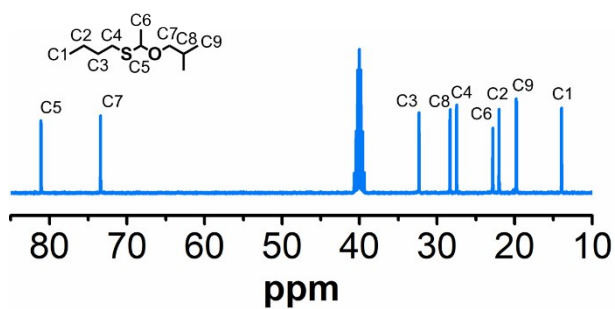

**Fig. S9**  $^{13}\text{C}$  NMR spectrum of model S,O-acetal **AB**.

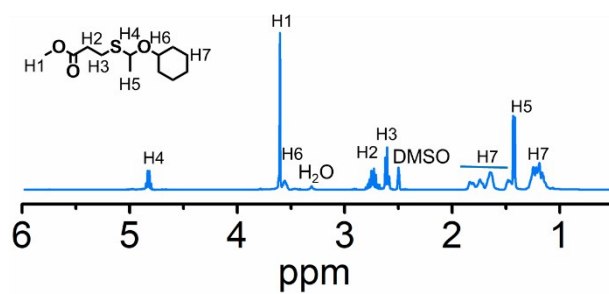

**Fig. S10**  $^1\text{H}$  NMR spectrum of model S,O-acetal **CD**.

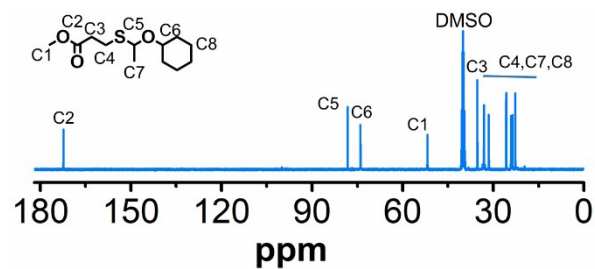

**Fig. S11**  $^{13}\text{C}$  NMR spectrum of model S,O-acetal **CD**.

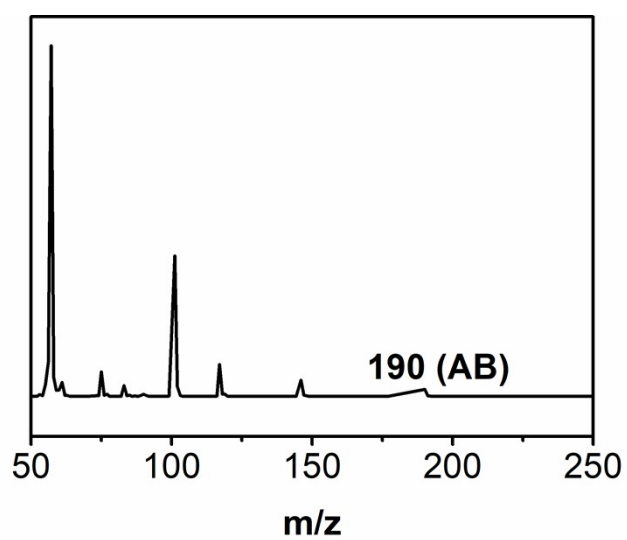

**Fig. S12** MS spectrum of **AB**.

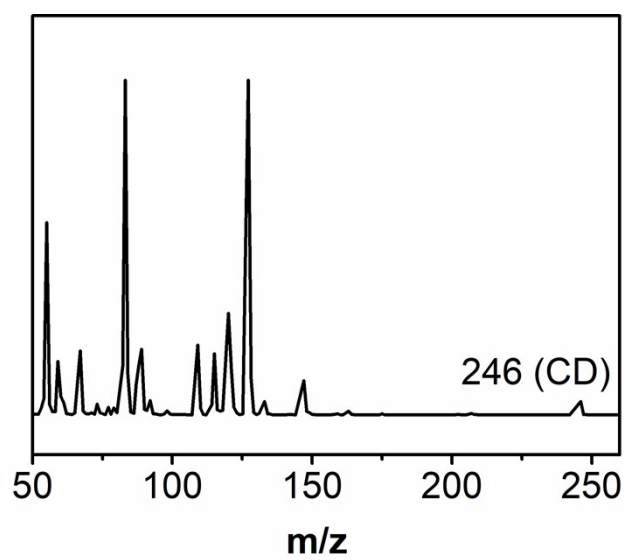

**Fig. S13** MS spectrum of **CD**.

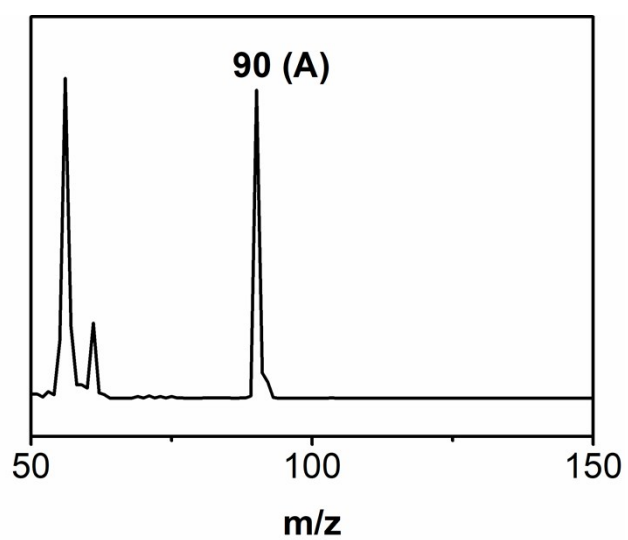

**Fig. S14** MS spectrum of A.

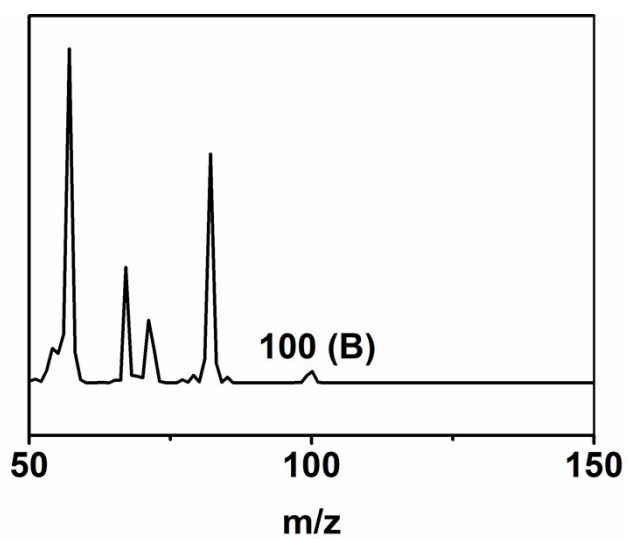

**Fig. S15** MS spectrum of B.

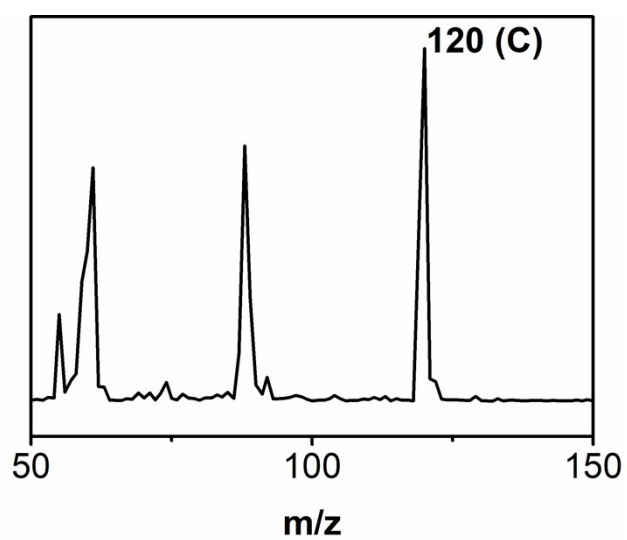

**Fig. S16** MS spectrum of **C**.

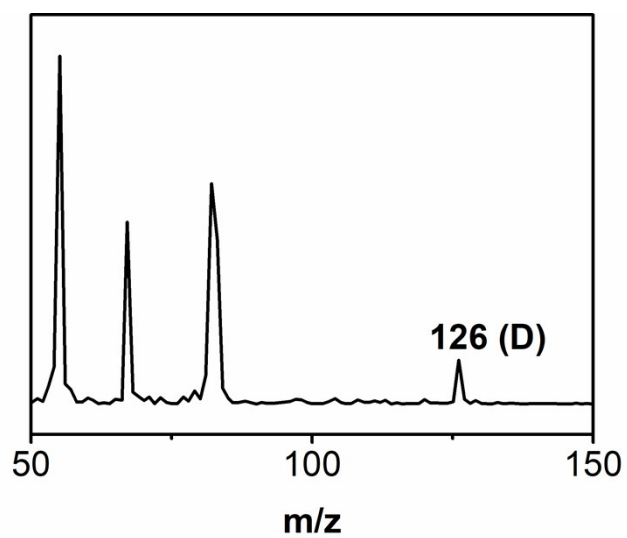

**Fig. S17** MS spectrum of **D**.

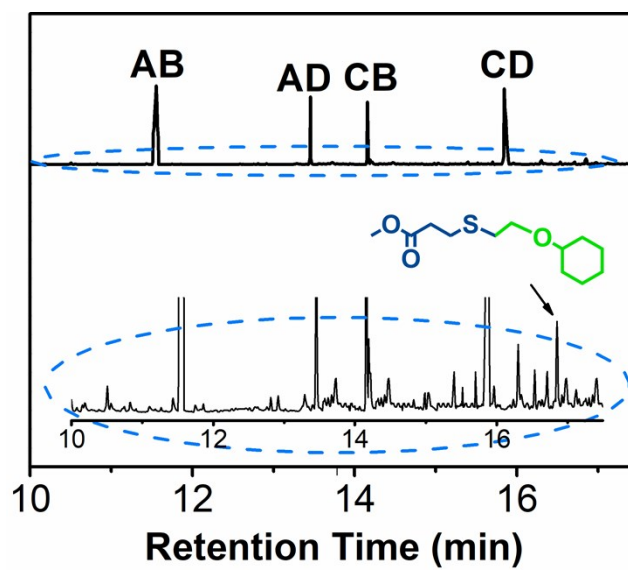

**Fig.S18** Normalized GC spectra of S,O-thioacetal **AB** and S,O-thioacetal **CD** mixture at 160 °C for 3 h.

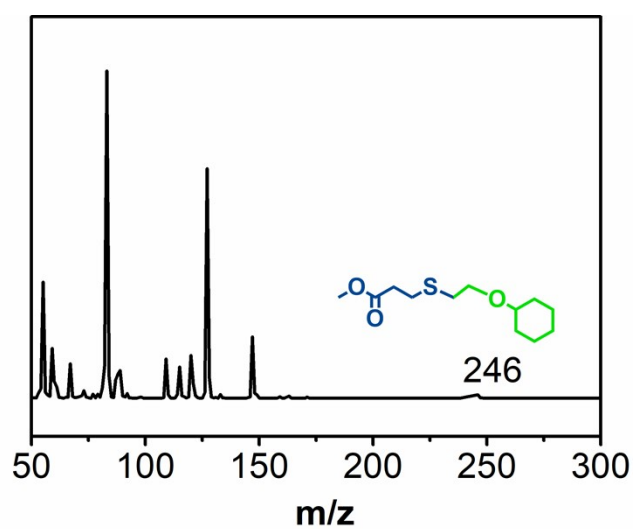

**Fig. S19** MS spectrum of CD's radical products.



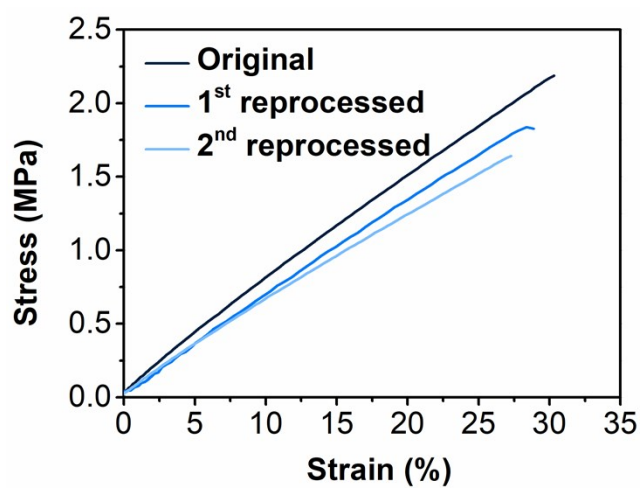

**Fig. S20** Representative tensile stress-strain curves of the original and reprocessed PTCD.

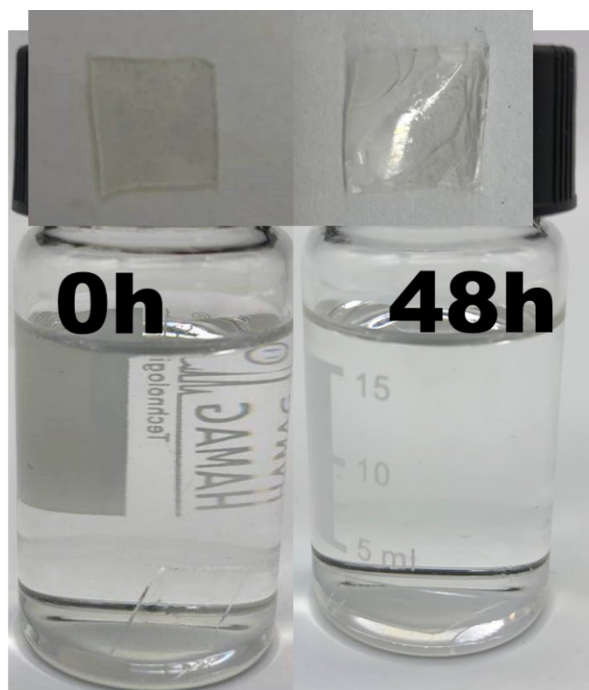

**Fig. S21** Image of PTCD immersed in MEK at 50 °C for 48 h.

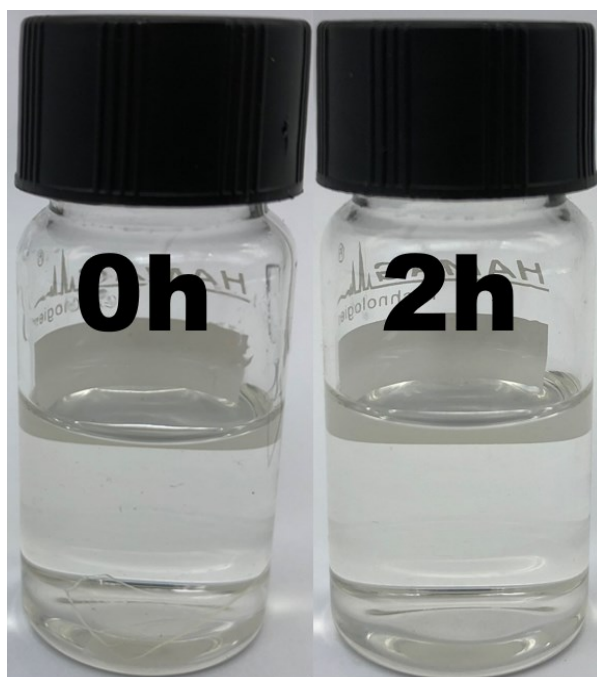

**Fig. S22** Degradation images of PTCD in 1 M HCl MEK solution at 50 °C.

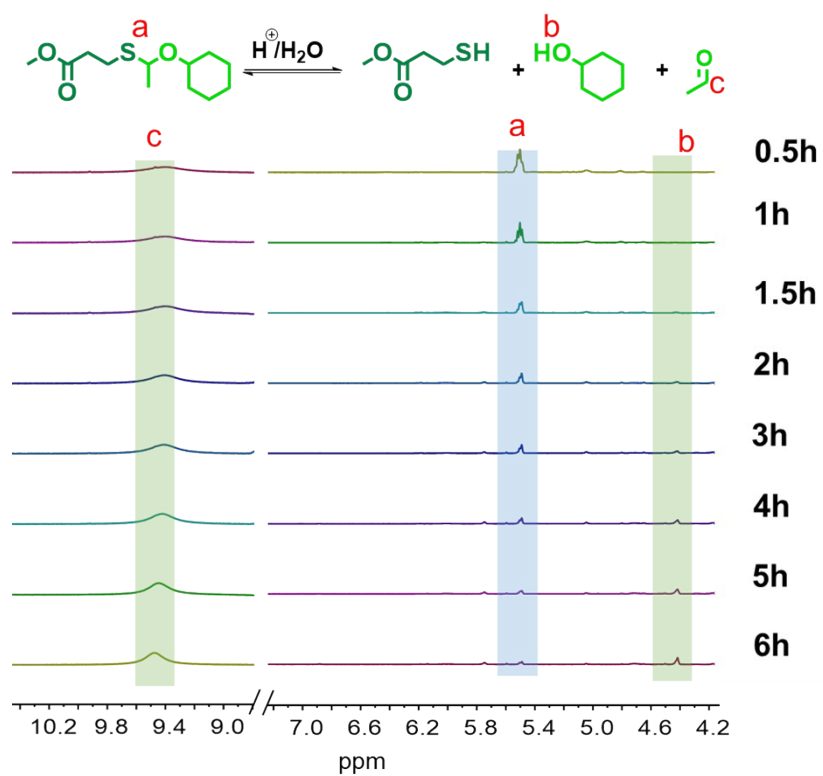

**Fig. S23** Real-time  $^1\text{H}$  NMR spectra of the 1 M HCl acetone- $\text{d}_6/\text{H}_2\text{O}$  (9/1, v/v) solution after adding S,O-acetal **CD** for different times at room temperature.

**Table S1** Degradation rate of PTCD at different conditions.

| Sample | Acid<br>concentration | Organic<br>solvent | Organic<br>solvent/H <sub>2</sub> O<br>(v/v) | Organic<br>solvent<br>(mL) | H <sub>2</sub> O<br>(mL) | 37%HCl<br>(mL)                         | Temperature<br>(°C) | Degradation<br>rate<br>(g L <sup>-1</sup> h <sup>-1</sup> ) |
|--------|-----------------------|--------------------|----------------------------------------------|----------------------------|--------------------------|----------------------------------------|---------------------|-------------------------------------------------------------|
| 1      | 1M                    | MEK                | 10/0                                         | 11                         | 0                        | 1                                      | 25                  | 0.257                                                       |
| 2      | 1M                    | MEK                | 10/0                                         | 11                         | 0                        | 1                                      | 50                  | 1.834                                                       |
| 3      | 1M                    | THF                | 10/0                                         | 11                         | 0                        | 1                                      | 50                  | 1.09                                                        |
| 4      | 1M                    | Acetone            | 10/0                                         | 11                         | 0                        | 1                                      | 50                  | 0.872                                                       |
| 5      | 1M                    | Methanol           | 10/0                                         | 11                         | 0                        | 1                                      | 50                  | 0.21                                                        |
| 6      | 1M                    | Ethanol            | 10/0                                         | 11                         | 0                        | 1                                      | 50                  | 0.192                                                       |
| 7      | 1M                    | DMF                | 10/0                                         | 11                         | 0                        | 1                                      | 50                  | -                                                           |
| 8      | 1M                    | Water              | 10/0                                         | 11                         | 0                        | 1                                      | 50                  | -                                                           |
| 9      | 1M                    | MEK                | 9/1                                          | 9.9                        | 1.1                      | 1                                      | 50                  | 1.122                                                       |
| 10     | 1M                    | THF                | 9/1                                          | 9.9                        | 1.1                      | 1                                      | 50                  | 0.661                                                       |
| 11     | 0.5M                  | MEK                | 9/1                                          | 10.35                      | 1.55                     | 0.5                                    | 50                  | 0.673                                                       |
| 12     | 0.5M                  | THF                | 9/1                                          | 10.35                      | 1.55                     | 0.5                                    | 50                  | 0.353                                                       |
| 13     | 0.1M                  | MEK                | 9/1                                          | 10.71                      | 1.19                     | 0.1                                    | 50                  | 0.246                                                       |
| 14     | 0.1M                  | THF                | 9/1                                          | 10.71                      | 1.19                     | 0.1                                    | 50                  | 0.142                                                       |
| 15     | 0.01M                 | MEK                | 9/1                                          | 10.79                      | 1.11                     | 0.01                                   | 50                  | -                                                           |
| 16     | 0.01M                 | THF                | 9/1                                          | 10.79                      | 1.11                     | 0.01                                   | 50                  | -                                                           |
| 17     | 1M                    | MEK                | 9/1                                          | 10.22                      | 1.13                     | 0.65 (H <sub>2</sub> SO <sub>4</sub> ) | 50                  | 1.246                                                       |
| 18     | 1M                    | THF                | 9/1                                          | 10.22                      | 1.13                     | 0.65 (H <sub>2</sub> SO <sub>4</sub> ) | 50                  | 0.685                                                       |
| 19     | 1M                    | MEK                | 9/1                                          | 10.06                      | 1.12                     | 0.82 (H <sub>3</sub> PO <sub>4</sub> ) | 50                  | -                                                           |
| 20     | 1M                    | THF                | 9/1                                          | 10.06                      | 1.12                     | 0.82 (H <sub>3</sub> PO <sub>4</sub> ) | 50                  | -                                                           |
| 21     | 1M                    | MEK                | 9/1                                          | 10.12                      | 1.13                     | 0.68 (CH <sub>3</sub> COOH)            | 50                  | -                                                           |
| 22     | 1M                    | THF                | 9/1                                          | 10.12                      | 1.13                     | 0.68 (CH <sub>3</sub> COOH)            | 50                  | -                                                           |
| 23     | 1M                    | MEK                | 8/2                                          | 8.8                        | 2.2                      | 1                                      | 50                  | 0.762                                                       |
| 24     | 1M                    | THF                | 8/2                                          | 8.8                        | 2.2                      | 1                                      | 50                  | 0.511                                                       |
| 25     | 1M                    | MEK                | 7/3                                          | 7.7                        | 3.3                      | 1                                      | 50                  | 0.390                                                       |
| 26     | 1M                    | THF                | 7/3                                          | 7.7                        | 3.3                      | 1                                      | 50                  | 0.317                                                       |
| 27     | 1M                    | MEK                | 6/4                                          | 6.6                        | 4.4                      | 1                                      | 50                  | 0.183                                                       |
| 28     | 1M                    | THF                | 6/4                                          | 6.6                        | 4.4                      | 1                                      | 50                  | 0.136                                                       |

## References

- 1 M. Uchiyama, M. Osumi, K. Satoh and M. Kamigaito, *Angew. Chem. Int. Ed.*, 2020, **59**, 6832-6838.
- 2 M. Capelot, M. M. Unterlass, F. Tournilhac and L. Leibler, *ACS Macro Lett.*, 2012, **1**, 789-792.
